# Supplementary material
Source: HighWire-hosted journal article supplement (https://www.jpn.ca/highwire/filestream/89446/field_highwire_adjunct_files/0/jpn-180115-1-at.pdf)
Supplement: jpn-180115-1-at.pdf [file jpn-180115-1-at.pdf]

**Appendix 1** to Petker T, Owens MM, Amlung MT, et al. Cannabis involvement and neuropsychological performance: findings from the Human Connectome Project.. *J Psychiatry Neurosci* 2019.

DOI: 10.1503/jpn.180115

Copyright © 2019 The Author(s) or their employer(s). To receive this resource in an accessible format, please contact us at [cmajgroup@cmaj.ca](mailto:cmajgroup@cmaj.ca).

*Online appendices are unedited and posted as supplied by the authors.*

## SUPPLEMENTARY MATERIALS

**Supplementary Table 1. Zero-order correlation matrix between covariates and cannabis involvement variables.**

|                           | 1       | 2       | 3       | 4       | 5      | 6       | 7       | 8      | 9      | 10     | 11     |
|---------------------------|---------|---------|---------|---------|--------|---------|---------|--------|--------|--------|--------|
| 1. Sex                    | —       |         |         |         |        |         |         |        |        |        |        |
| 2. Age                    | .214**  | —       |         |         |        |         |         |        |        |        |        |
| 3. Income                 | .004    | .266**  | —       |         |        |         |         |        |        |        |        |
| 4. Education              | .041    | .091**  | .388**  | —       |        |         |         |        |        |        |        |
| 5. Tobacco Use            | -.145** | .007    | -.187** | -.326** | —      |         |         |        |        |        |        |
| 6. Alcohol Use            | .205**  | .054    | -.075   | -.118** | -.064* | —       |         |        |        |        |        |
| 7. DZ Twin                | .086*   | .058    | .007    | .023    | .015   | -.006   | —       |        |        |        |        |
| 8. MZ Twin                | .046    | .074*   | .054    | .007    | -.037  | .039    | -.246** | —      |        |        |        |
| 9. UDS THC+               | -.141** | -.085** | -.246** | -.288** | .325** | -.100** | -.022   | -.090* | —      |        |        |
| 10. CUD+                  | -.182** | -.022   | -.089*  | -.112** | .228** | -.128** | -.015   | -.027  | .271** | —      |        |
| 11. Cannabis AFU          | -.127** | -.001   | -.099** | -.145** | .298** | -.215** | -.016   | -.061  | .329** | .409** | —      |
| 12. Lifetime Cannabis Use | -.194** | -.012   | -.156** | -.169** | .353** | -.269** | .008    | -.067  | .502** | .556** | .800** |

Notes: DZ Twin = dizygotic twin status; MZ Twin = monozygotic twin status; UDS = Urine Drug Screen; THC = tetrahydrocannabinol; CUD = Cannabis Use Disorder; AFU = age of first use; SPCPT. \* Correlation is significant at the .005 level (2-tailed); \*\* Correlation is significant at the .001 level (2-tailed)

*Online appendices are unedited and posted as supplied by the authors.*

**Supplemental Table 2. Hierarchical regressions comprising covariate model (Sex, Age, Income, Education, Tobacco Use, Alcohol Use, DZ Twin, MZ Twin) and cannabis involvement variables (UDS THC, CUD and cannabis AFU) .**

| Neuropsychological Test | Covariate Model R <sup>2</sup> | P      | Cannabis Involvement $\Delta$ R <sup>2</sup> | P      |
|-------------------------|--------------------------------|--------|----------------------------------------------|--------|
| Word Memory Test        | .050                           | <.001* | .003                                         | .383   |
| Flanker Task            | .031                           | <.001* | .008                                         | .020   |
| Card Sorting Task       | .032                           | <.001* | .003                                         | .403   |
| SPCPT                   | .049                           | <.001* | .005                                         | .115   |
| Progressive Matrices    | .141                           | <.001* | .012                                         | .001*  |
| Delay Discounting       | .063                           | <.001* | .003                                         | .316   |
| Picture Sequence Task   | .070                           | <.001* | .010                                         | .005*  |
| Pattern Completion      | .033                           | <.001* | .016                                         | <.001* |
| List Sorting Task       | .067                           | <.001* | .006                                         | .061   |
| 9-hole Pegboard         | .104                           | <.001* | .005                                         | .098   |

Note: DZ Twin = dizygotic twin status; MZ Twin = monozygotic twin status; UDS = Urine Drug Screen; THC = tetrahydrocannabinol; CUD = Cannabis Use Disorder; AFU = age of first use; \* Significant at the  $p < .005$  level.

*Online appendices are unedited and posted as supplied by the authors.*

**Supplemental Table 3. Individual hierarchical regressions of covariates and cannabis involvement variables in relation to neuropsychological performance for regression models significant at the  $p < .005$  level.**

| Model                       | Variables    | Progressive Matrices |        | Picture Sequence |        | Processing Speed |        |
|-----------------------------|--------------|----------------------|--------|------------------|--------|------------------|--------|
|                             |              | $\beta$              | $P$    | $\beta$          | $P$    | $\beta$          | $P$    |
| <i>Covariate Model</i>      | Gender       | .145                 | <.001* | .147             | <.001* | .019             | .540   |
|                             | Age          | .083                 | .005*  | -.037            | .229   | -.041            | .185   |
|                             | Income       | -.065                | .037   | .069             | .034   | .060             | .070   |
|                             | Education    | -.258                | <.001* | .173             | <.001* | .070             | .037   |
|                             | Tobacco      | .092                 | .003*  | .018             | .567   | .002             | .952   |
|                             | Alcohol      | .035                 | .235   | -.016            | .594   | -.055            | .072   |
|                             | DZ Twin      | -.009                | .751   | .035             | .239   | .075             | .014   |
|                             | MZ Twin      | -.011                | .687   | -.001            | .962   | .052             | .088   |
| <i>Cannabis Involvement</i> | UDS THC+     | .064                 | .042   | -.113            | <.001* | -.126            | <.001* |
|                             | Cannabis AFU | .059                 | .063   | .030             | .366   | -.035            | .295   |
|                             | CUD+         | -.105                | .001*  | .034             | .282   | .064             | .050   |

Notes: DZ Twin = dizygotic twin status; MZwin = monozygotic twin status; UDS = Urine Drug Screen; THC = tetrahydrocannabinol; AFU = age of first use; CUD = Cannabis Use Disorder; \*Significant at the  $p < .005$  level.

Online appendices are unedited and posted as supplied by the authors.

| Model                   | Variables    | Females<br>Progressive<br>Matrices |          | Males<br>Progressive<br>Matrices |          | Females<br>Picture<br>Sequence |          | Males<br>Picture<br>Sequence |          | Females<br>Pattern<br>Completion |          | Males<br>Pattern<br>Completion |          |
|-------------------------|--------------|------------------------------------|----------|----------------------------------|----------|--------------------------------|----------|------------------------------|----------|----------------------------------|----------|--------------------------------|----------|
|                         |              | $\beta$                            | <i>P</i> | $\beta$                          | <i>P</i> | $\beta$                        | <i>P</i> | $\beta$                      | <i>P</i> | $\beta$                          | <i>P</i> | $\beta$                        | <i>P</i> |
| Covariate<br>Model      | Age          | .037                               | .347     | .098                             | .030     | -.035                          | .408     | -.037                        | .431     | .028                             | .506     | -.070                          | .132     |
|                         | Income       | -.076                              | .077     | -.048                            | .318     | .125                           | .006     | .005                         | .913     | .085                             | .066     | .044                           | .372     |
|                         | Education    | -.329                              | <.001    | -.192                            | <.001    | .227                           | <.001    | .120                         | .017     | .075                             | .105     | .058                           | .248     |
|                         | Tobacco      | .103                               | .012     | .083                             | .082     | .036                           | .404     | -.001                        | .990     | .038                             | .388     | -.020                          | .678     |
|                         | Alcohol      | .076                               | .058     | -.004                            | .923     | .028                           | .498     | -.051                        | .257     | -.139                            | .001     | .007                           | .884     |
|                         | DZ Twin      | .029                               | .461     | -.050                            | .246     | .018                           | .672     | .040                         | .372     | .002                             | .960     | .129                           | .004     |
|                         | MZ Twin      | .042                               | .289     | -.069                            | .107     | -.048                          | .323     | -.018                        | .689     | .008                             | .850     | .091                           | .040     |
| Cannabis<br>Involvement | UDS THC+     | .013                               | .774     | .080                             | .111     | -.048                          | .458     | -.183                        | <.001    | -.130                            | .008     | -.105                          | .042     |
|                         | Lifetime Use | .032                               | .529     | .097                             | .106     | .040                           | .458     | .010                         | .865     | .003                             | .959     | -.064                          | .298     |
|                         | CUD+         | -.142                              | .001     | -.113                            | .031     | .056                           | .211     | .032                         | .550     | .096                             | .035     | .065                           | .225     |

**Supplementary Table 4. Sex-stratified individual hierarchical regressions of covariates and cannabis involvement variables in relation to neuropsychological performance.**

Note: DZ Twin = dizygotic twin status; MZ Twin = monozygotic twin status; UDS = Urine Drug Screen; THC = tetrahydrocannabinol; CUD = Cannabis Use Disorder
